# Supplementary material
Source: publisher figshare collection journal article supplement (https://karger.figshare.com/articles/dataset/_/5123665)
Supplement: Supplementary file 1 [file 1]

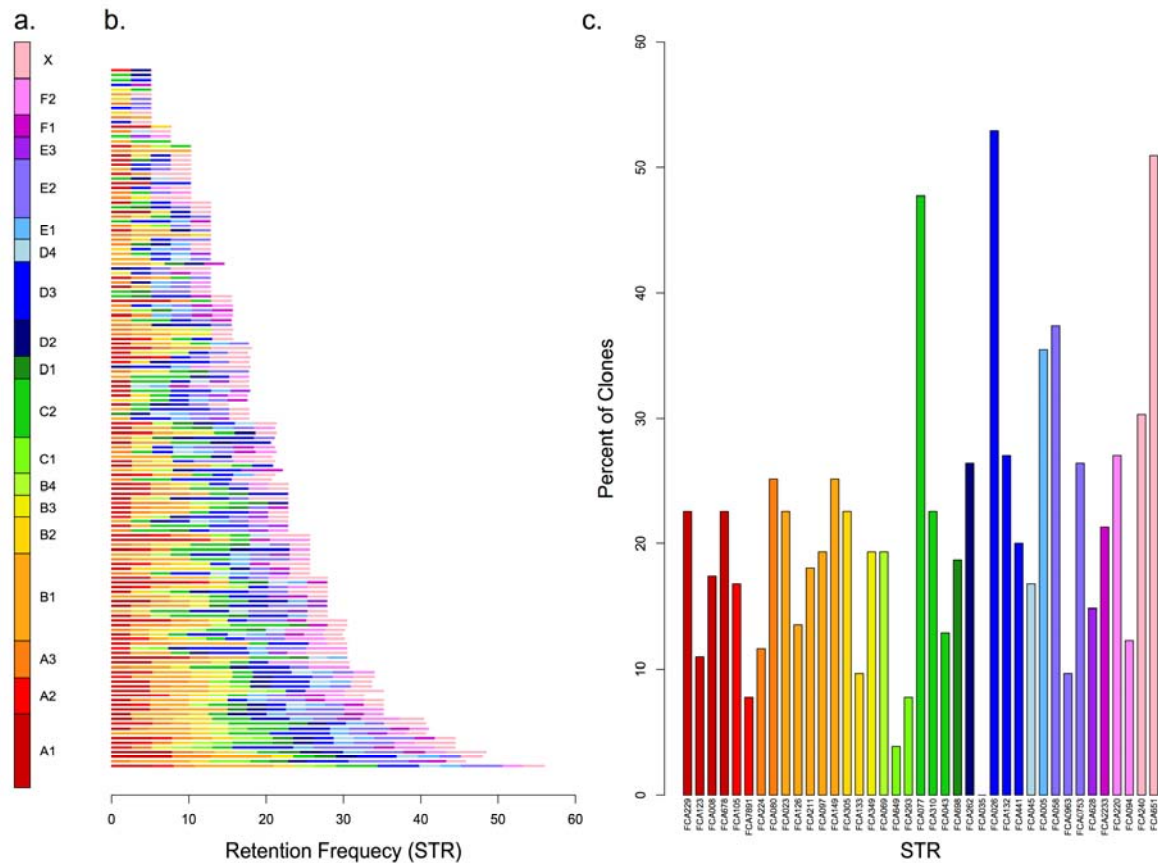

**Supplementary Figure 1.** STR characterization of cat RH panel. A. Feline chromosomes representing marker distribution. The length of each bar indicates the number of markers characterized on each chromosome. B. Retention frequencies of STR markers according to clone; each horizontal line represents a separate clone line and indicates the markers present in each clone. The length of the bar for each chromosome color indicates how many markers from that chromosome were positive in each clone. C. Percent of clones carrying specific STR markers; bar color represents chromosome of origin for each STR.
