# Supplementary material
Source: publisher figshare collection journal article supplement (https://karger.figshare.com/articles/dataset/_/5123665)
Supplement: Supplementary file 2 [file 1 › 000339416_sm_Table_5.pdf]

**Supplementary Table 5:** Average retention frequencies for each 1 Mb region analyzed via high-throughput SNP genotyping.

| <b>Chromosome</b> | <b>Average RF</b> | <b>Minimum RF</b> | <b>Maximum RF</b> |
|-------------------|-------------------|-------------------|-------------------|
| <b>A1</b>         | 19.9%             | 12.8%             | 31.5%             |
| <b>F2</b>         | 35.4%             | 26.7%             | 44.7%             |
| <b>A2</b>         | 27.0%             | 14.7%             | 40.0%             |
| <b>B3</b>         | 21.8%             | 18.0%             | 34.7%             |
| <b>C2</b>         | 26.8%             | 15.3%             | 40.7%             |
| <b>D1</b>         | 36.5%             | 28.0%             | 44.7%             |
| <b>D2</b>         | 33.8%             | 26.7%             | 46.7%             |
| <b>D4</b>         | 28.5%             | 22.0%             | 39.3%             |
| <b>E2</b>         | 33.5%             | 27.3%             | 44.7%             |
| <b>X</b>          | 26.1%             | 16.1%             | 38.3%             |
